# Supplementary material for: Estimating oceanic vertical velocities in a wind-influenced coastal environment
Source: Copernicus journal article supplement (doi:10.5194/egusphere-2025-2757), 2025-07-08

## E) Instantaneous depth average of VV

Figure S18 - Depth averaged vertical velocities across the entire time series. The orange (blue) scatters are positive (negative) values of VV, and the green scatters represent what is identified as biology-induced signal, and filtered out. The orange and blue boxes are respectively our targeted upwellings and downwellings.

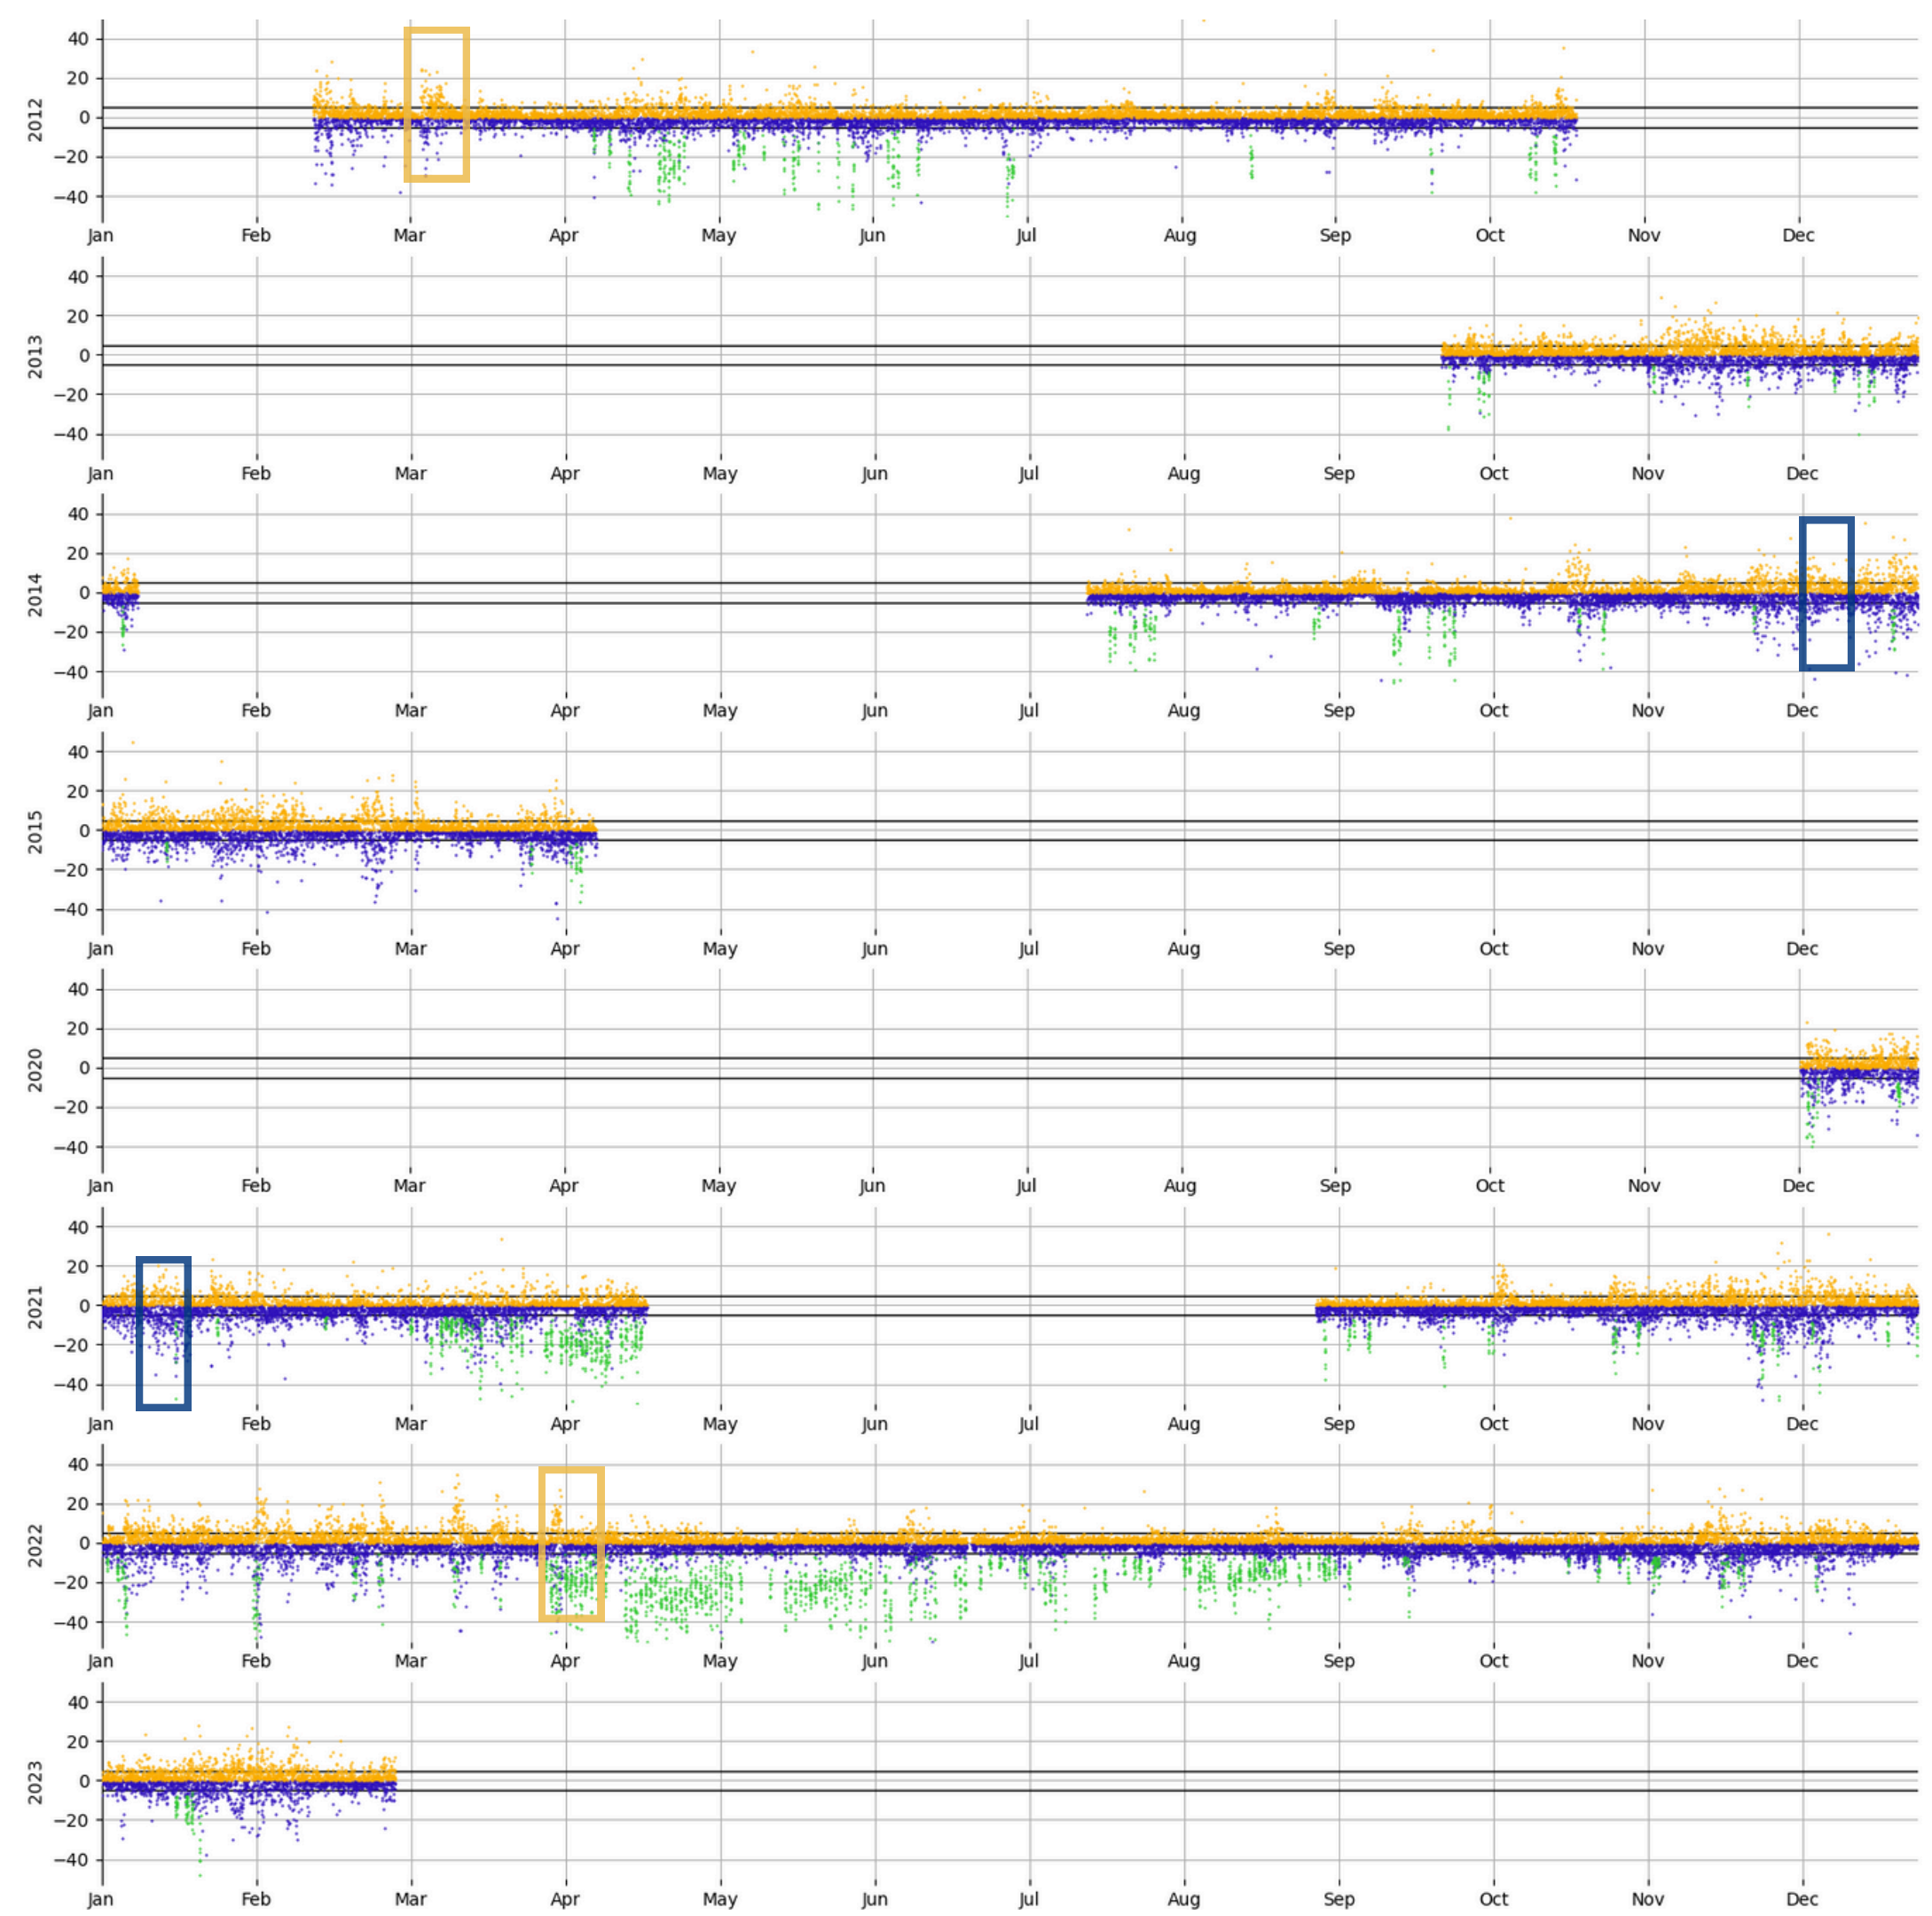

Supplement: Supplementary file 1 [file Supplementary_materials_JULIO_S18.pdf › Supplementary_materials/Supplementary_materials_JULIO_S18.pdf]
